# Supplementary material for: Phenylethanolamine N-methyltransferase downregulation is associated with malignant pheochromocytoma/paraganglioma
Source: PubMed Central journal article supplement (PMC5029690; doi:10.18632/oncotarget.8234), 2016-03-21
Supplement: oncotarget-07-24141-s001.pdf [file oncotarget-07-24141-s001.pdf]

## Phenylethanolamine N-methyltransferase downregulation is associated with malignant pheochromocytoma/paraganglioma

### Supplementary Materials

**Supplementary Table S1: Upregulated genes expressed in malignant versus benign PCC/PGL**

| Gene symbol | Gene name                                              | Benign average expression | Malignant average expression | Fold change |
|-------------|--------------------------------------------------------|---------------------------|------------------------------|-------------|
| GAD1        | glutamate decarboxylase 1 (brain, 67 kDa)              | 4.53                      | 10.86                        | 80.48       |
| PITX1       | paired-like homeodomain 1                              | 4.46                      | 10.53                        | 67.16       |
| CHRD2       | chordin-like 2                                         | 4.18                      | 9.86                         | 51.21       |
| PCDH7       | protocadherin 7                                        | 3.95                      | 7.27                         | 9.93        |
| HMCN1       | hemicentin 1                                           | 6.03                      | 9.33                         | 9.90        |
| POU3F2      | POU class 3 homeobox 2                                 | 6.15                      | 9.18                         | 8.12        |
| PAX3        | paired box 3                                           | 4.47                      | 7.70                         | 9.40        |
| SATB2       | SATB homeobox 2                                        | 5.32                      | 8.59                         | 9.66        |
| WDR86       | WD repeat domain 86                                    | 5.84                      | 9.10                         | 9.57        |
| KCNG3       | potassium voltage-gated channel, subfamily G, member 3 | 4.69                      | 7.95                         | 9.56        |
| NRG3        | neuregulin 3                                           | 5.79                      | 8.54                         | 6.70        |
| FOXA1       | forkhead box A1                                        | 4.71                      | 7.19                         | 5.59        |
| FGFR2       | fibroblast growth factor receptor 2                    | 3.44                      | 6.18                         | 6.65        |

**Supplementary Table S2: Downregulated genes expressed in malignant versus benign PCC/PGL**

| Gene symbol | Gene name                                          | Benign average expression | Malignant average expression | Fold change |
|-------------|----------------------------------------------------|---------------------------|------------------------------|-------------|
| PNMT        | phenylethanolamine N-methyltransferase             | 14.80                     | 7.49                         | 158.39      |
| MYLK3       | myosin light chain kinase 3                        | 8.34                      | 2.56                         | 55.21       |
| KCNT1       | potassium channel, subfamily T, member 1           | 12.31                     | 6.56                         | 53.76       |
| GHRH        | growth hormone releasing hormone                   | 11.29                     | 5.56                         | 52.98       |
| VSTM2L      | V-set and transmembrane domain containing 2 like   | 11.65                     | 6.39                         | 38.22       |
| RGS22       | regulator of G-protein signaling 22                | 9.04                      | 4.08                         | 31.01       |
| ARC         | activity-regulated cytoskeleton-associated protein | 14.80                     | 10.15                        | 25.12       |
| NEFH        | neurofilament, heavy polypeptide                   | 13.24                     | 8.74                         | 22.56       |
| RET         | ret proto-oncogene                                 | 13.08                     | 8.63                         | 21.78       |
| KRT19       | keratin 19                                         | 15.60                     | 11.12                        | 22.29       |

|         |                                                                                                |       |      |       |
|---------|------------------------------------------------------------------------------------------------|-------|------|-------|
| MGMT    | O-6-methylguanine-DNA methyltransferase                                                        | 12.69 | 9.85 | 7.14  |
| GALNT6  | UDP-N-acetyl-alpha-D-galactosamine:polypeptide N-acetylgalactosaminyltransferase 6 (GalNAc-T6) | 11.97 | 8.28 | 12.86 |
| KRT19P2 | keratin 19 pseudogene 2                                                                        | 10.76 | 6.97 | 13.89 |
| JAKMIP1 | janus kinase and microtubule interacting protein 1                                             | 11.62 | 7.17 | 22.00 |
| SLC32A1 | solute carrier family 32 (GABA vesicular transporter), member 1                                | 9.60  | 5.46 | 17.66 |

**Supplementary Table S3: PNMT real-time PCR primers and probes**

| Gene    | Sequence               | Product size |
|---------|------------------------|--------------|
| PNMT-F  | ATGATGTCAAGGGCGTCTTC   | 109 bp       |
| PNMT-R  | CCACTTCAAAGAACAGGGAATC |              |
| HPRT1-F | TGACACTGGCAAAACAATGCA  | 94 bp        |
| HPRT1-R | GGTCCTTTTCACCAGCAAGCT  |              |
| GUSB-F  | CTCATTGGAATTTGCCGATT   | 81 bp        |
| GUSB-R  | CCGAGTGAAGATCCCCTTTTA  |              |
